# Supplementary material
Source: PubMed Central journal article supplement (PMC545518)

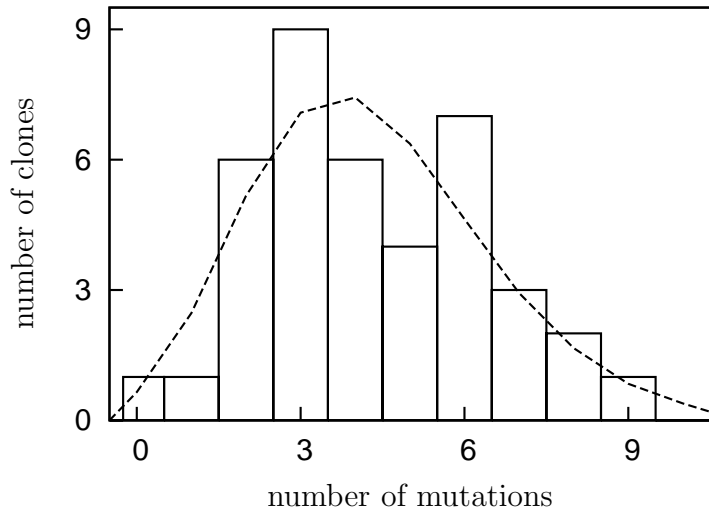

Supplement: pnas_102_3_606__2.pdf [file pnas_102_3_606__2.pdf]
